# Supplementary material for: Binding Specificity of a Novel Cyclo/Maltodextrin-Binding Protein and Its Role in the Cyclodextrin ABC Importer System from Thermoanaerobacterales
Source: MDPI journal article supplement (doi:10.3390/molecules28166080), 2023-08-16
Supplement: s1 [file s1]

**Supporting information to:**

**Binding specificity of a novel cyclodextrin-binding protein and its role in the cyclodextrin ABC importer system from *Thermoanaerobacterales***

Jorge Aranda-Caraballo, Roberto A. Saenz, Alonso A. López-Zavala, Beatriz Velazquez-Cruz, Laura Espinosa-Barrera, Yair Cárdenas-Conejo, Andrés Zárate-Romero, Oscar Linares-Vergara, Juan A. Osuna-Castro, Edgar Bonales-Alatorre, Sara Centeno-Leija, and Hugo Serrano-Posada

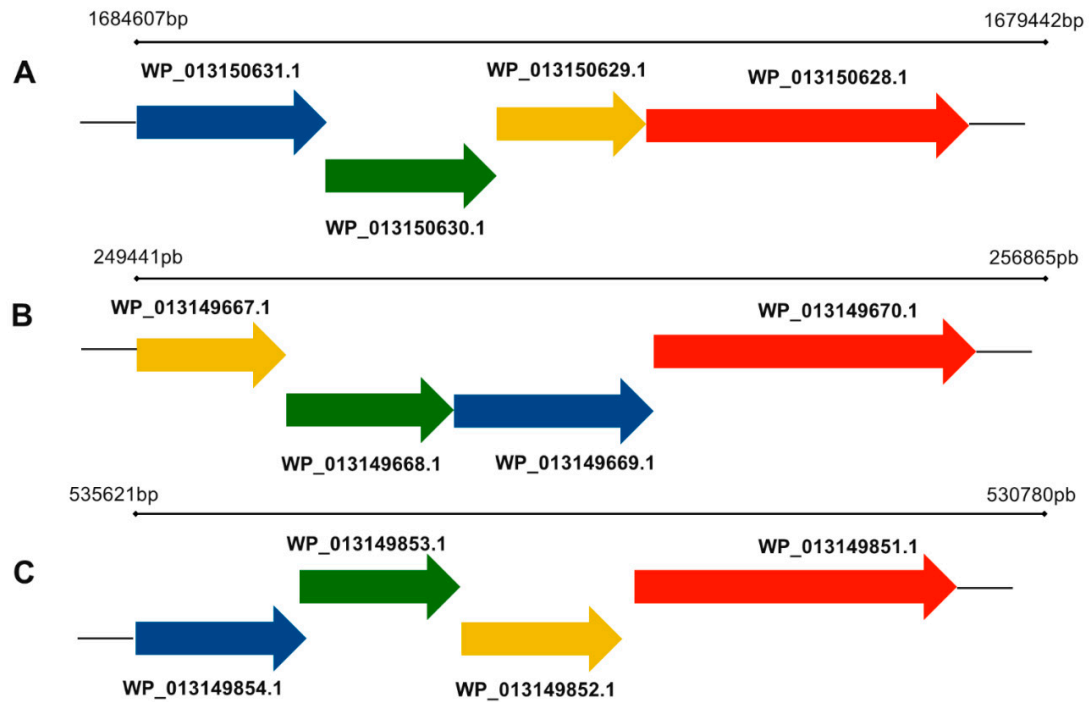

**Figure S1.** Gene clusters for alternative carbohydrate internalization pathways involving an ABC transporter and an extracellular glycosyl hydrolase (GH) from *T. mathranii* subsp. *mathranii* (NCBI Taxonomy ID: 583358). Note the GH-encoding gene (red arrow) involved in each pathway: **(A)** alpha-mannosidase, **(B)** beta-galactosidase, and **(C)** maltogenic  $\alpha$ -amylase. Proteins from the ABC transporters are also indicated in different colors: SBPs (blue arrow), permeases F (green arrow), and G (yellow arrow).

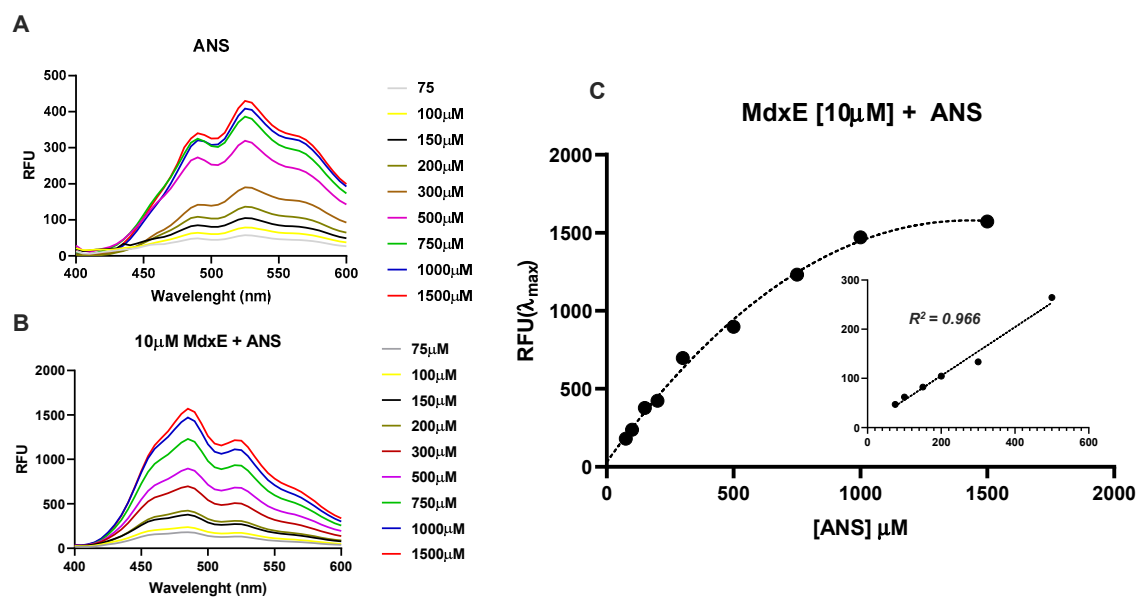

**Figure S2.** MdxE-ANS binding optimization for  $H_2O$  determination. **(A)** Increment of intensity (RFU) as a function of ANS concentration. **(B)** The binding capacity of ANS to MdxE (10  $\mu$ M) by fluorescence measurements. **(C)** Linearity range for the increase in fluorescent response at  $\lambda_{max}$ = 485 nm as a function of ANS concentration. Note that the scans were taken in the 400-600 nm range.

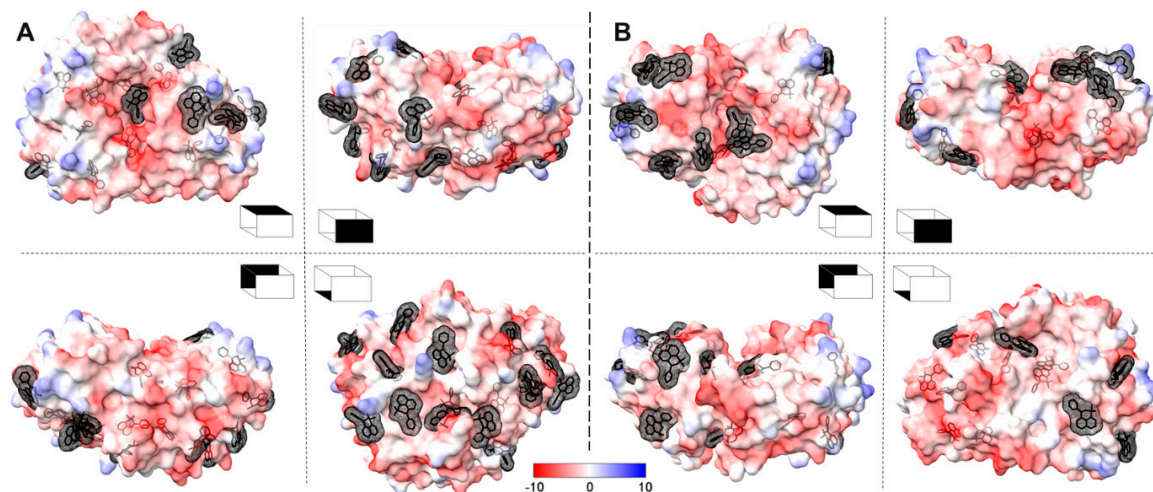

**Figure S3.** Docked structures of the ANS fluorescence probe on the MdxE surface in open and closed conformations. The surface electrostatic potential map of MdxE in closed (**A**) and open (**B**) conformations shows the potential binding regions for ANS (black meshed surface). The negatively and positively charged surfaces of MdxE are colored red and blue, respectively, and the hydrophobic surface is colored white. The electrostatic surface was calculated in ChimeraX using the default coulombic values.



**Table S1.** Results of Tukey's test for multiple comparisons of  $H_0$  from different CDs and linear dextrans.

| Contrast                    | Estimate | SE   | df  | t.ratio | p.value  |
|-----------------------------|----------|------|-----|---------|----------|
| blank - $\alpha$ -CD        | -23.25   | 1.22 | 171 | -19.02  | 0        |
| blank - $\beta$ -CD         | -27.95   | 1.22 | 171 | -22.86  | 0        |
| blank - $\gamma$ -CD        | -10.58   | 1.22 | 171 | -8.658  | 2.00E-13 |
| blank - G2                  | -1.194   | 1.22 | 171 | -0.9767 | 0.9875   |
| blank - G3                  | -10.44   | 1.22 | 171 | -8.544  | 3.22E-13 |
| blank - G5                  | -13.45   | 1.22 | 171 | -11.00  | 3.43E-14 |
| blank - G6                  | -12.97   | 1.22 | 171 | -10.61  | 5.72E-14 |
| blank - G7                  | -13.14   | 1.22 | 171 | -10.74  | 4.90E-14 |
| $\alpha$ -CD - $\beta$ -CD  | -4.701   | 1.22 | 171 | -3.846  | 0.005198 |
| $\alpha$ -CD - $\gamma$ -CD | 12.66    | 1.22 | 171 | 10.36   | 6.43E-14 |
| $\alpha$ -CD - G2           | 22.05    | 1.22 | 171 | 18.04   | 0        |
| $\alpha$ -CD - G3           | 12.80    | 1.22 | 171 | 10.47   | 6.01E-14 |
| $\alpha$ -CD - G5           | 9.801    | 1.22 | 171 | 8.017   | 5.91E-12 |
| $\alpha$ -CD - G6           | 10.27    | 1.22 | 171 | 8.408   | 6.36E-13 |
| $\alpha$ -CD - G7           | 10.11    | 1.22 | 171 | 8.270   | 1.37E-12 |
| $\beta$ -CD - $\gamma$ -CD  | 17.36    | 1.22 | 171 | 14.20   | 0        |
| $\beta$ -CD - G2            | 26.76    | 1.22 | 171 | 21.88   | 0        |
| $\beta$ -CD - G3            | 17.50    | 1.22 | 171 | 14.32   | 0        |
| $\beta$ -CD - G5            | 14.50    | 1.22 | 171 | 11.86   | 0        |
| $\beta$ -CD - G6            | 14.98    | 1.22 | 171 | 12.25   | 0        |
| $\beta$ -CD - G7            | 14.81    | 1.22 | 171 | 12.11   | 0        |
| $\gamma$ -CD - G2           | 9.391    | 1.22 | 171 | 7.681   | 4.19E-11 |
| $\gamma$ -CD - G3           | 0.1392   | 1.22 | 171 | 0.1139  | 1        |
| $\gamma$ -CD - G5           | -2.866   | 1.22 | 171 | -2.344  | 0.3219   |
| $\gamma$ -CD - G6           | -2.388   | 1.22 | 171 | -1.953  | 0.5778   |
| $\gamma$ -CD - G7           | -2.556   | 1.22 | 171 | -2.091  | 0.4827   |
| G2 - G3                     | -9.251   | 1.22 | 171 | -7.567  | 8.08E-11 |
| G2 - G5                     | -12.25   | 1.22 | 171 | -10.02  | 7.09E-14 |
| G2 - G6                     | -11.77   | 1.22 | 171 | -9.635  | 7.23E-14 |
| G2 - G7                     | -11.94   | 1.22 | 171 | -9.772  | 7.32E-14 |
| G3 - G5                     | -3.005   | 1.22 | 171 | -2.458  | 0.2600   |
| G3 - G6                     | -2.527   | 1.22 | 171 | -2.067  | 0.4990   |
| G3 - G7                     | -2.695   | 1.22 | 171 | -2.205  | 0.4071   |
| G5 - G6                     | 0.4779   | 1.22 | 171 | 0.3909  | 0.9999   |
| G5 - G7                     | 0.3095   | 1.22 | 171 | 0.2531  | 0.9999   |
| G6 - G7                     | -0.1684  | 1.22 | 171 | -0.1377 | 1        |

**Table S2.** Summary of docking simulations from MdxE in open and closed conformations with different CDs and linear dextrans.

| <b>Ligand</b> | <b>Closed Form</b>                      | <b>Open Form</b>                        |
|---------------|-----------------------------------------|-----------------------------------------|
|               | $\Delta G$<br>(kcal mol <sup>-1</sup> ) | $\Delta G$<br>(kcal mol <sup>-1</sup> ) |
| $\alpha$ -CD  | -10.8                                   | -8.6                                    |
| $\beta$ -CD   | -9.7                                    | -8.5                                    |
| $\gamma$ -CD  | -10.8                                   | -8.7                                    |
| G3            | -7.3                                    | -6.7                                    |
| G5            | -7.4                                    | -6.1                                    |
| G6            | -9.1                                    | -4.2                                    |
| G7            | -4.5                                    | -4.0                                    |
| G2            | -6.8                                    | -5.2                                    |

**Table S3.** Template information and statistical validation for homology models from elements involved in CD synthesis and cellular internalization.

| Protein                   | Template<br>(PDB ID) | GMQE * | QMEANDisCo ** | Resolution<br>(Å) | Sequence<br>identity<br>(%) |
|---------------------------|----------------------|--------|---------------|-------------------|-----------------------------|
| ThmA                      | 6WNI                 | 0.95   | 0.94          | 1.6               | 83                          |
| MdxE<br>( <i>closed</i> ) | 1URD                 | 0.81   | 0.81          | 1.5               | 43                          |
| MdxE<br>( <i>open</i> )   | 2ZYO                 | 0.70   | 0.71          | 1.5               | 34                          |
| MdxF                      | 3PUV                 | 0.62   | 0.71          | 2.4               | 41                          |
| MdxG                      | 3PUV                 | 0.51   | 0.67          | 2.4               | 36                          |
| MsmX                      | 1Q12                 | 0.70   | 0.68          | 2.3               | 47                          |

\* GMQE: Global Model Quality Estimate.

\*\* QMEANDisCo: Scoring function for global and local absolute quality on the model. Ensembles of distance constraints (DisCo) are used to assess the agreement of pairwise residue-residue distance.
